# Supplementary material
Source: MDPI journal article supplement (https://www.mdpi.com/2073-4395/12/12/2981)
Supplement: s1 [file s1 › agronomy-1967755-supplementary.pdf]

## Supplementary material

Figure S1: Different LCC shades used for nitrogen application in maize varieties

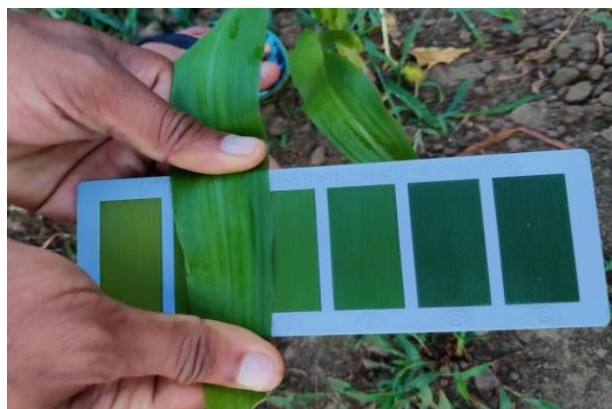

25% N as basal  $\leq$  LCC 3@20 kg N ha<sup>-1</sup>

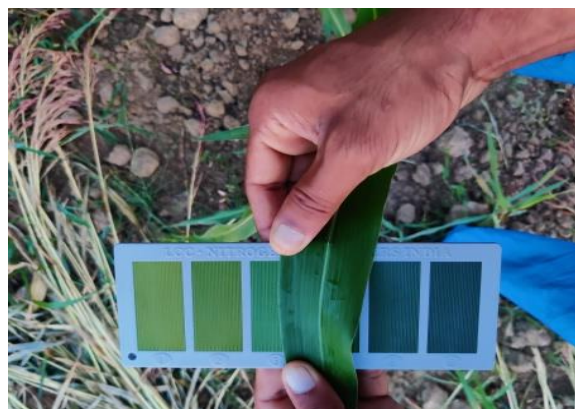

25% N as basal  $\leq$  LCC 3@ 30 kg N ha<sup>-1</sup>

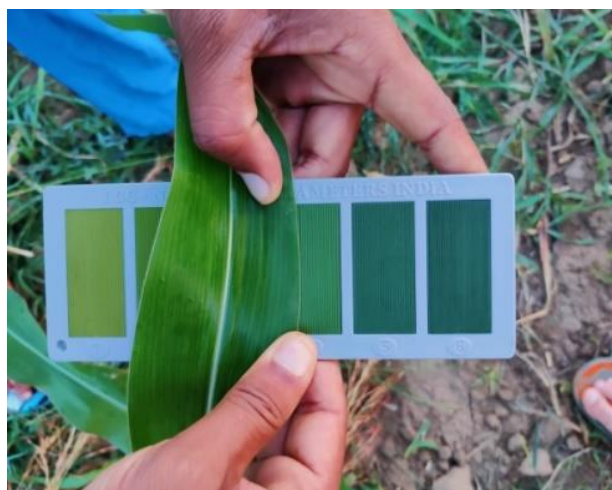

25% N as basal  $\leq$  LCC 4@ 20 kg N ha<sup>-1</sup>

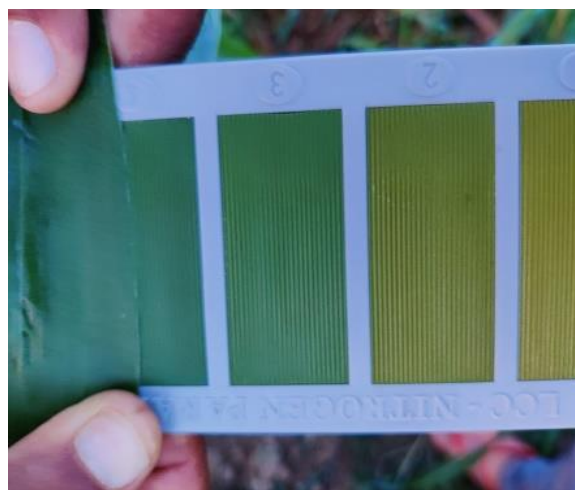

25% N as basal  $\leq$  LCC 4@ 30 kg N ha<sup>-1</sup>

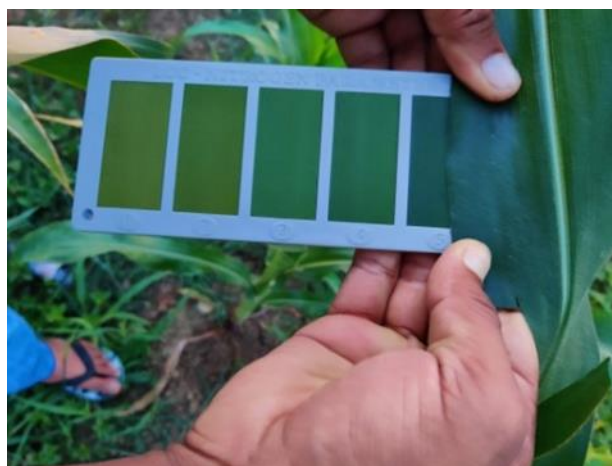

25% N as basal  $\leq$  LCC 5@ 20 kg N ha<sup>-1</sup>

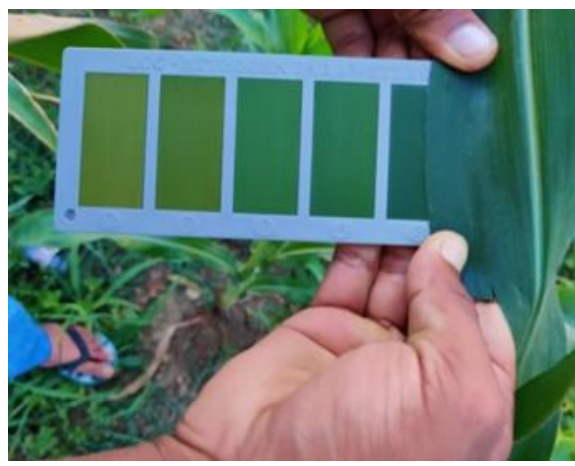

25% N as basal  $\leq$  LCC 5@ 30 kg N ha<sup>-1</sup>
